# Supplementary material for: Preprocessing differential methylation hybridization microarray data
Source: Springer Nature journal article supplement (doi:10.1186/1756-0381-4-13), 2011-05-16

**A: Normalization (T.stat)**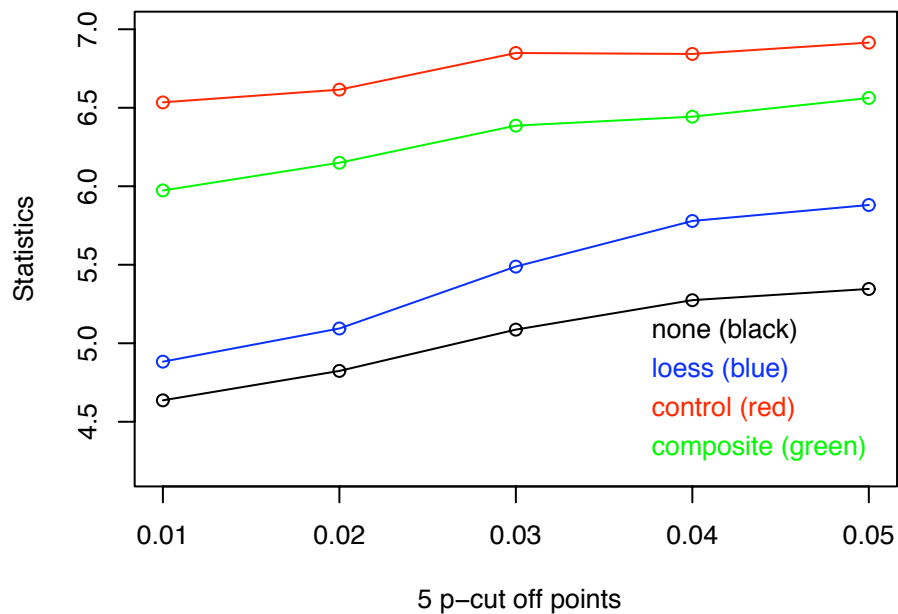**C: Normalization (AUC)**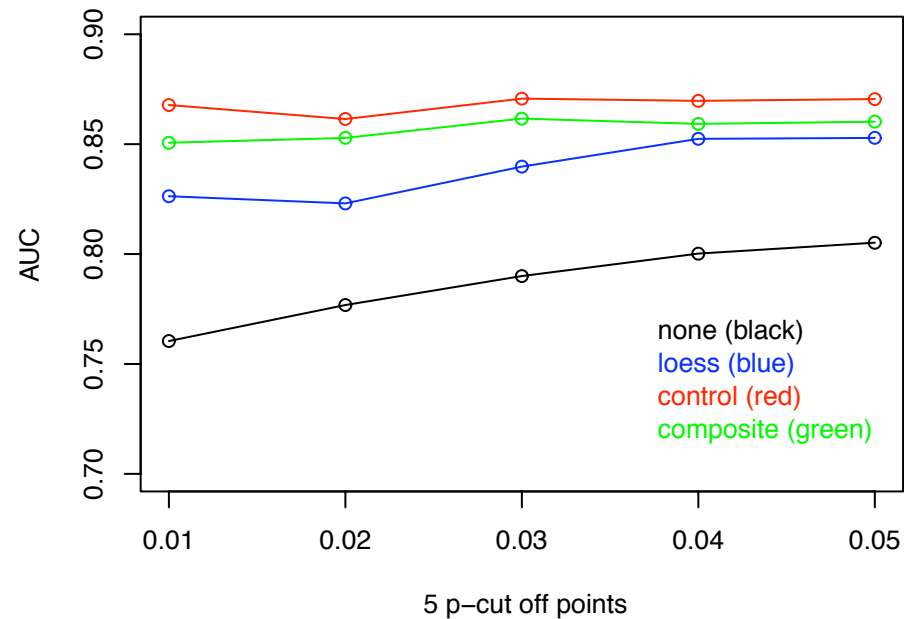**B: Background Correction (T.stat)**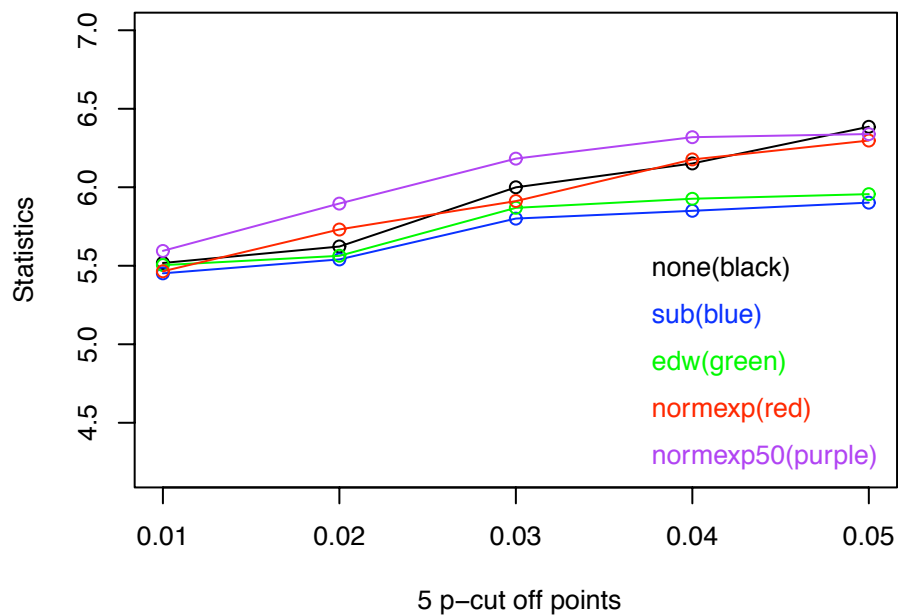**D: Background Correction (AUC)**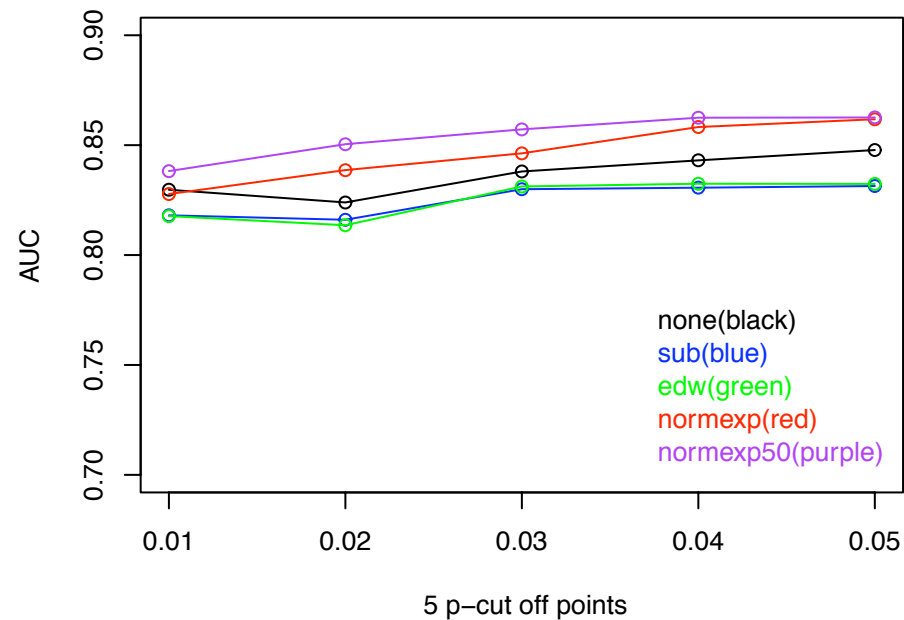

Supplement: 13040_2010_45_MOESM2_ESM.pdf [file 13040_2010_45_MOESM2_ESM.pdf]
